# Supplementary material for: Efficacy of Corticosteroid Therapy for HTLV-1-Associated Myelopathy: A Randomized Controlled Trial (HAMLET-P)
Source: Viruses. 2022 Jan 12;14(1):136. doi: 10.3390/v14010136 (PMC8780460; doi:10.3390/v14010136)
Supplement: Supplementary file 1 [file viruses-14-00136-s001.zip]

Archive with 5 entries (5 files):
- Appendix A_TrialProtocol.pdf
- Appendix B_StatisticalAnalysisPlan_Rapid_final.pdf
- Appendix C_StatisticalAnalysisPlan_Slow_final.pdf
- Appendix D_CONSORT-2010-Checklist_HAMLET-P_submit.pdf
- SuppelementaryMaterial.pdf
